# Supplementary material for: A new approach for joint assimilation of cosmic-ray neutron soil moisture and groundwater level data into an integrated terrestrial model
Source: Copernicus journal article supplement (doi:10.5194/egusphere-2025-2124), 2025-06-10
Supplement: Supplementary file 1 [file egusphere-2025-2124-supplement.pdf]

# Supplement

**Table S1. Evaluation metrics of root mean square error (RMSE) and correlation coefficients (R) for soil moisture and evapotranspiration during 2016-2018 in open-loop (OL) and univariate assimilation scenarios of soil moisture (SM\_DA and SM\_DA\_PAR) and groundwater level (GWL\_DA and GWL\_DA\_PAR).**

| Year      | Variable                                           | OL   | SM_DA | SM_DA_PAR | GWL_DA | GWL_DA_PAR |
|-----------|----------------------------------------------------|------|-------|-----------|--------|------------|
| 2016      | SM<br>(RMSE,<br>cm <sup>3</sup> /cm <sup>3</sup> ) | 0.11 | 0.06  | 0.05      | 0.12   | 0.12       |
| 2017      |                                                    | 0.10 | 0.05  | 0.04      | 0.10   | 0.11       |
| 2018      |                                                    | 0.09 | 0.05  | 0.04      | 0.10   | 0.11       |
| 2016-2018 |                                                    | 0.10 | 0.05  | 0.05      | 0.10   | 0.11       |
| 2016      | SM (R)                                             | 0.62 | 0.85  | 0.85      | 0.50   | 0.47       |
| 2017      |                                                    | 0.63 | 0.88  | 0.88      | 0.58   | 0.43       |
| 2018      |                                                    | 0.61 | 0.89  | 0.90      | 0.56   | 0.46       |
| 2016-2018 |                                                    | 0.62 | 0.87  | 0.88      | 0.55   | 0.46       |
| 2016      | ET<br>(RMSE,<br>mm/day)                            | 0.76 | 0.72  | 0.71      | 0.76   | 0.76       |
| 2017      |                                                    | 0.79 | 0.77  | 0.77      | 0.79   | 0.79       |
| 2018      |                                                    | 0.73 | 0.75  | 0.75      | 0.73   | 0.73       |
| 2016-2018 |                                                    | 0.76 | 0.74  | 0.74      | 0.76   | 0.76       |
| 2016      | ET (R)                                             | 0.82 | 0.80  | 0.81      | 0.82   | 0.82       |
| 2017      |                                                    | 0.86 | 0.86  | 0.86      | 0.86   | 0.86       |
| 2018      |                                                    | 0.83 | 0.82  | 0.82      | 0.83   | 0.83       |
| 2016-2018 |                                                    | 0.84 | 0.83  | 0.83      | 0.84   | 0.84       |

**Table S2. Root mean square error (RMSE) values of groundwater level (m) from 2016 to 2018 for the open-loop (OL) and univariate assimilation scenarios of groundwater level (GWL\_DA and GWL\_DA\_PAR) and soil moisture (SM\_DA and SM\_DA\_PAR).**

| Year      | Distance  | OL   | GWL_DA | GWL_DA_PAR | SM_DA | SM_DA_PAR |
|-----------|-----------|------|--------|------------|-------|-----------|
| 2016      | 0         | 7.30 | 3.40   | 2.04       | 7.39  | 7.92      |
| 2017      |           | 7.24 | 2.77   | 2.05       |       |           |
| 2018      |           | 7.24 | 2.50   | 2.05       |       |           |
| 2016-2018 |           | 7.26 | 2.89   | 2.05       |       |           |
| 2016      | 0-0.5km   | 7.27 | 6.51   | 3.66       | 8.43  | 7.96      |
| 2017      |           | 6.98 | 4.43   | 3.87       |       |           |
| 2018      |           | 6.77 | 3.83   | 3.56       |       |           |
| 2016-2018 |           | 7.01 | 4.92   | 3.70       |       |           |
| 2016      | 0.5-2.5km | 6.49 | 6.49   | 5.55       | 7.84  | 7.69      |
| 2017      |           | 6.45 | 5.84   | 5.69       |       |           |
| 2018      |           | 6.31 | 5.52   | 5.52       |       |           |
| 2016-2018 |           | 6.42 | 5.95   | 5.59       |       |           |
| 2016      | 2.5-5km   | 7.12 | 6.89   | 5.92       | 7.89  | 7.86      |
| 2017      |           | 7.10 | 6.29   | 5.82       |       |           |
| 2018      |           | 6.92 | 6.05   | 5.89       |       |           |
| 2016-2018 |           | 7.05 | 6.41   | 5.88       |       |           |

**Table S3. Root mean square error (RMSE) values of groundwater level (m) from 2016 to 2018 for the open-loop (OL) and multivariate assimilation scenarios (FC\_DA, FC\_DA\_PAR, WC\_DA, WC\_DA\_PAR,**

WC\_DA\_r and WC\_DA\_r\_PAR). Note: “0 km” indicates assimilation locations; validation sites are grouped by distance from these points: <0.5 km, 0.5-2.5 km, and 2.5-5 km.

| Year      | Distance  | OL   | FC_DA | FC_DA_PAR | WC_DA | WC_DA_PAR | WC_DA_r | WC_DA_r_PAR |
|-----------|-----------|------|-------|-----------|-------|-----------|---------|-------------|
| 2016      | 0         | 7.30 | 3.36  | 3.27      | 3.17  | 2.17      | 3.25    | 2.38        |
| 2017      |           | 7.24 | 4.29  | 3.19      | 2.93  | 1.98      | 3.02    | 2.05        |
| 2018      |           | 7.24 | 3.64  | 3.32      | 3.38  | 2.03      | 2.62    | 2.15        |
| 2016-2018 |           | 7.26 | 3.76  | 3.26      | 3.16  | 2.06      | 2.96    | 2.19        |
| 2016      | 0-0.5km   | 7.27 | 4.73  | 4.55      | 4.11  | 4.24      | 4.40    | 4.52        |
| 2017      |           | 6.98 | 4.00  | 3.71      | 3.92  | 4.60      | 4.25    | 3.46        |
| 2018      |           | 6.77 | 3.15  | 3.70      | 3.85  | 3.56      | 3.93    | 3.58        |
| 2016-2018 |           | 7.01 | 3.96  | 3.98      | 3.96  | 4.13      | 4.19    | 3.85        |
| 2016      | 0.5-2.5km | 6.49 | 6.53  | 6.01      | 5.66  | 8.00      | 5.82    | 5.65        |
| 2017      |           | 6.45 | 5.84  | 5.74      | 5.55  | 5.68      | 5.72    | 5.58        |
| 2018      |           | 6.31 | 5.44  | 5.75      | 5.53  | 5.60      | 5.72    | 5.55        |
| 2016-2018 |           | 6.42 | 5.93  | 5.83      | 5.58  | 6.43      | 5.75    | 5.59        |
| 2016      | 2.5-5km   | 7.12 | 6.55  | 6.18      | 6.09  | 8.54      | 7.92    | 6.20        |
| 2017      |           | 7.10 | 6.03  | 5.91      | 5.99  | 6.18      | 7.46    | 8.17        |
| 2018      |           | 6.92 | 5.77  | 5.92      | 6.01  | 5.92      | 6.37    | 5.91        |
| 2016-2018 |           | 7.05 | 6.12  | 6.00      | 6.03  | 6.88      | 7.25    | 6.76        |

**Table S4. Evaluation metrics of root mean square error (RMSE) and correlation coefficients (R) for soil moisture and evapotranspiration during 2016-2018 in open-loop (OL) and multivariate assimilation scenarios of soil moisture (FC\_DA, FC\_DA\_PAR, WC\_DA, WC\_DA\_PAR, WC\_DA\_r and WC\_DA\_r\_PAR).**

| Year      | Variable                                        | OL   | FC_DA | FC_DA_PAR | WC_DA | WC_DA_PAR | WC_DA_r | WC_DA_r_PAR |
|-----------|-------------------------------------------------|------|-------|-----------|-------|-----------|---------|-------------|
| 2016      | SM<br>(RMSE, cm <sup>3</sup> /cm <sup>3</sup> ) | 0.11 | 0.05  | 0.05      | 0.07  | 0.05      | 0.06    | 0.05        |
| 2017      |                                                 | 0.10 | 0.07  | 0.06      | 0.05  | 0.04      | 0.05    | 0.04        |
| 2018      |                                                 | 0.09 | 0.08  | 0.05      | 0.07  | 0.04      | 0.05    | 0.04        |
| 2016-2018 |                                                 | 0.10 | 0.07  | 0.05      | 0.06  | 0.04      | 0.05    | 0.05        |
| 2016      | SM<br>(R)                                       | 0.62 | 0.85  | 0.87      | 0.75  | 0.90      | 0.74    | 0.88        |
| 2017      |                                                 | 0.63 | 0.74  | 0.81      | 0.85  | 0.89      | 0.86    | 0.88        |
| 2018      |                                                 | 0.61 | 0.69  | 0.85      | 0.71  | 0.92      | 0.88    | 0.89        |
| 2016-2018 |                                                 | 0.62 | 0.76  | 0.84      | 0.77  | 0.90      | 0.83    | 0.88        |
| 2016      | ET<br>(RMSE, mm/day)                            | 0.76 | 0.71  | 0.71      | 0.71  | 0.71      | 0.71    | 0.71        |
| 2017      |                                                 | 0.79 | 0.77  | 0.77      | 0.77  | 0.77      | 0.77    | 0.77        |
| 2018      |                                                 | 0.73 | 0.75  | 0.75      | 0.75  | 0.75      | 0.75    | 0.75        |
| 2016-2018 |                                                 | 0.76 | 0.74  | 0.75      | 0.74  | 0.74      | 0.74    | 0.74        |
| 2016      | ET<br>(R)                                       | 0.82 | 0.81  | 0.81      | 0.81  | 0.81      | 0.81    | 0.81        |
| 2017      |                                                 | 0.86 | 0.86  | 0.86      | 0.86  | 0.86      | 0.86    | 0.86        |
| 2018      |                                                 | 0.83 | 0.82  | 0.82      | 0.82  | 0.82      | 0.82    | 0.82        |
| 2016-2018 |                                                 | 0.84 | 0.83  | 0.83      | 0.83  | 0.83      | 0.83    | 0.83        |

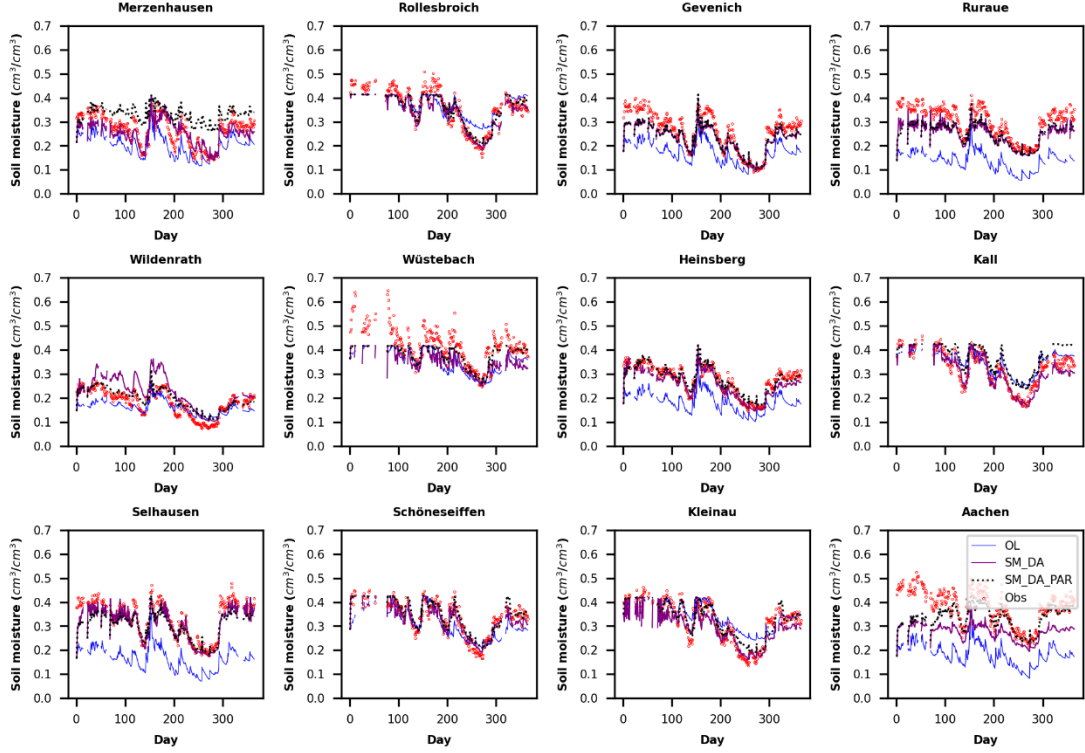

**Figure S1.** The soil moisture dynamics during 2016 were estimated using the OL (blue), SM\_DA (green), and SM\_DA\_PAR (black) scenarios and compared with field data obtained from CRNS instruments (red). Vertical weighting was applied to the simulated soil moisture to accurately represent the soil profile.

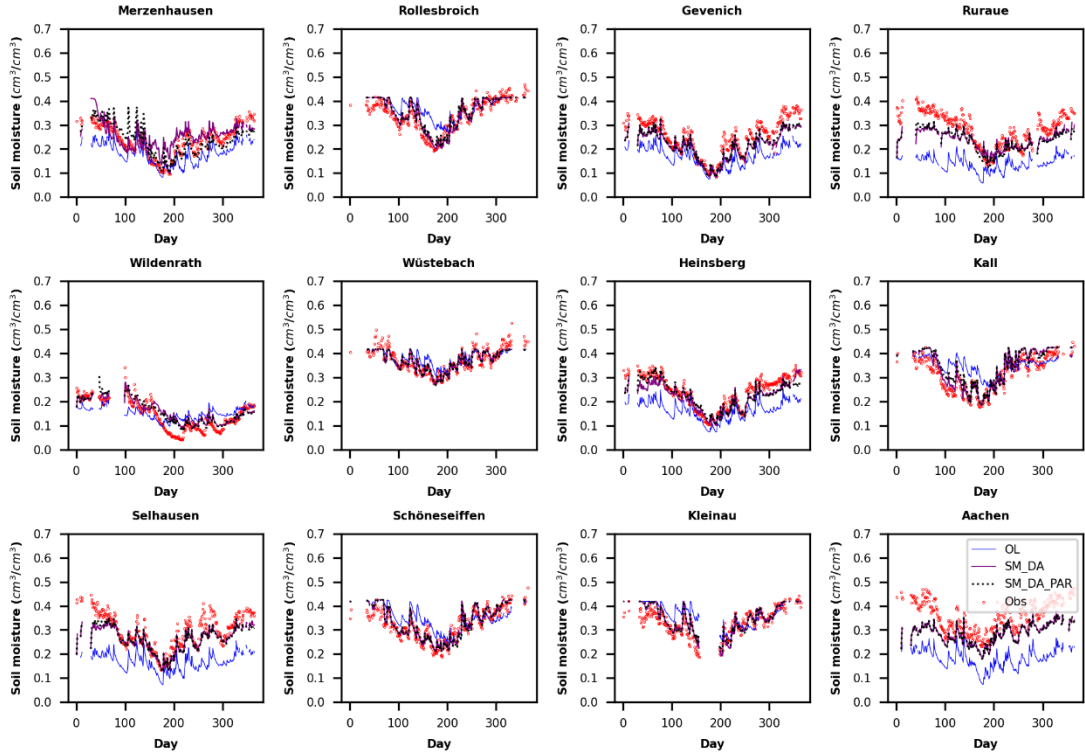

**Figure S2.** The soil moisture dynamics during 2017 were estimated using the OL (blue), SM\_DA (green), and SM\_DA\_PAR (black) scenarios and compared with field data obtained from CRNS instruments (red). Vertical weighting was applied to the simulated soil moisture to accurately represent the soil profile.

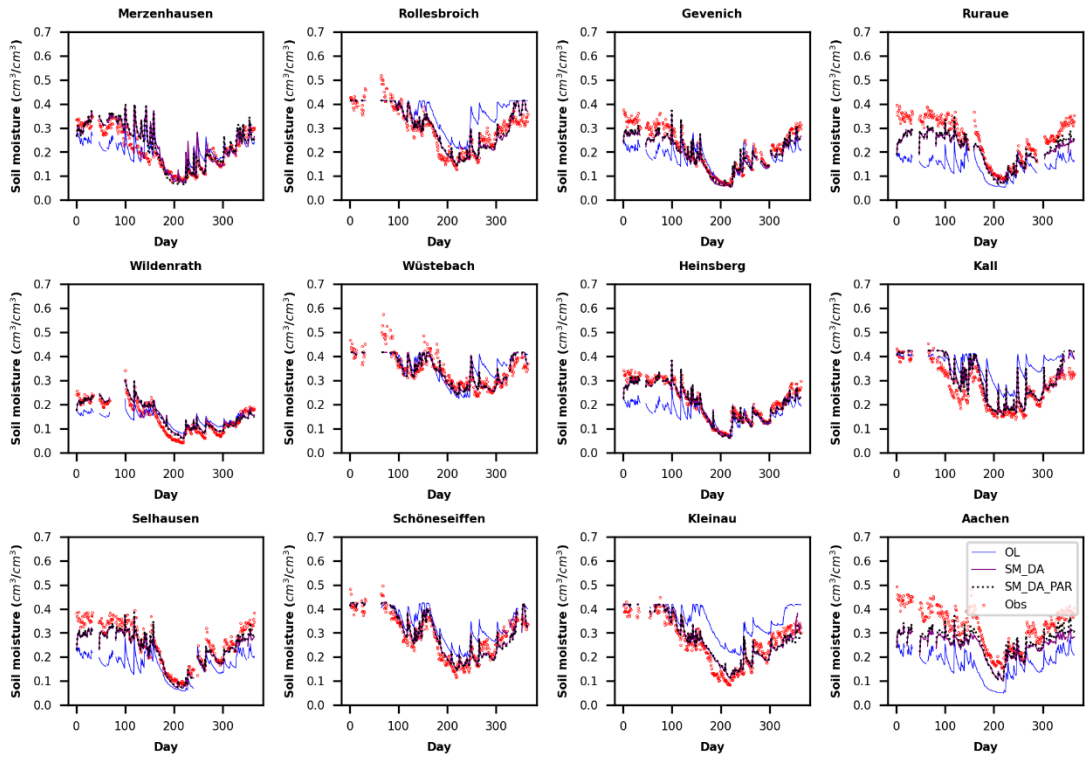

**Figure S3.** The soil moisture dynamics during 2018 were estimated using the OL (blue), SM\_DA (green), and SM\_DA\_PAR (black) scenarios and compared with field data obtained from CRNS instruments (red). Vertical weighting was applied to the simulated soil moisture to accurately represent the soil profile.

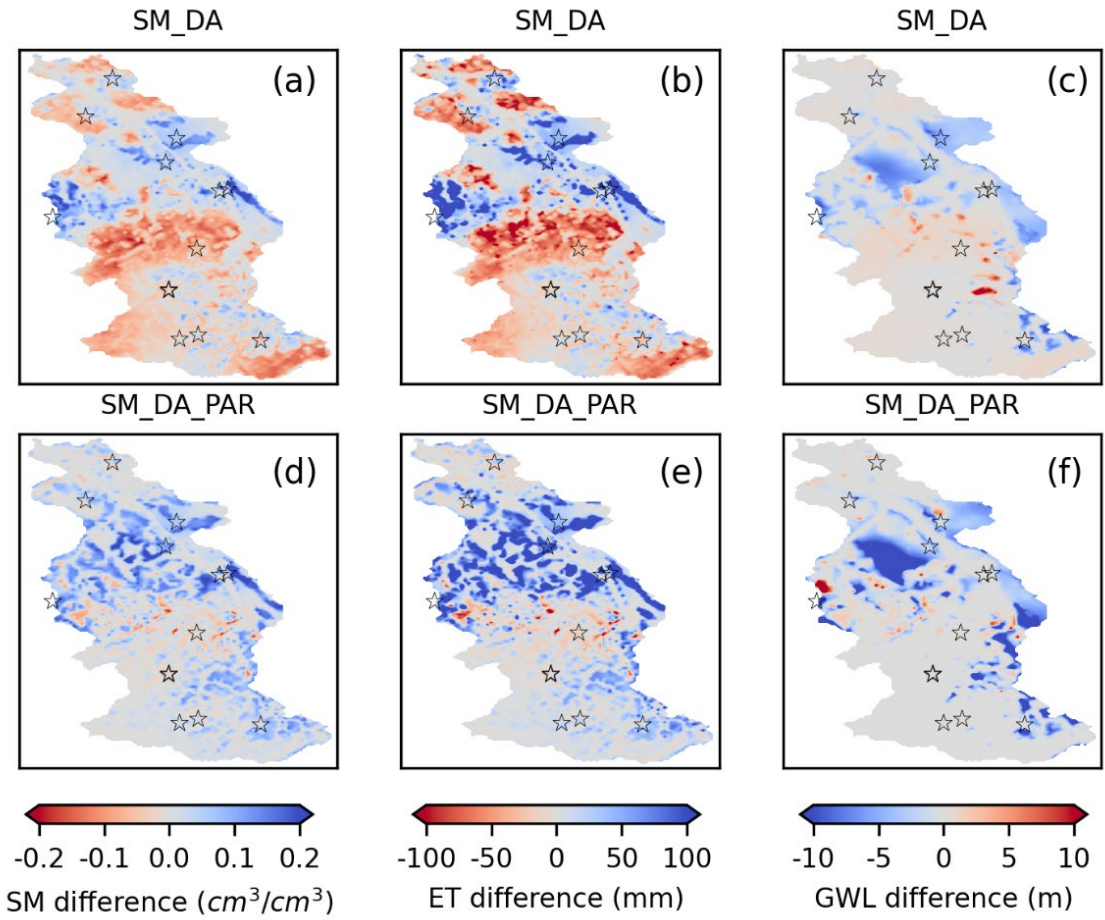

**Figure S4.** Spatial variations in annual soil moisture (0-80 cm), evapotranspiration, and groundwater level for 2016 are presented in panels (a)-(c), illustrating differences between SM\_DA and OL simulations (SM\_DA - OL). Panels (d)-(f) display similar contrasts between SM\_DA\_PAR and OL (SM\_DA\_PAR - OL). Black pentagrams indicate the locations of the CRNS monitoring stations.

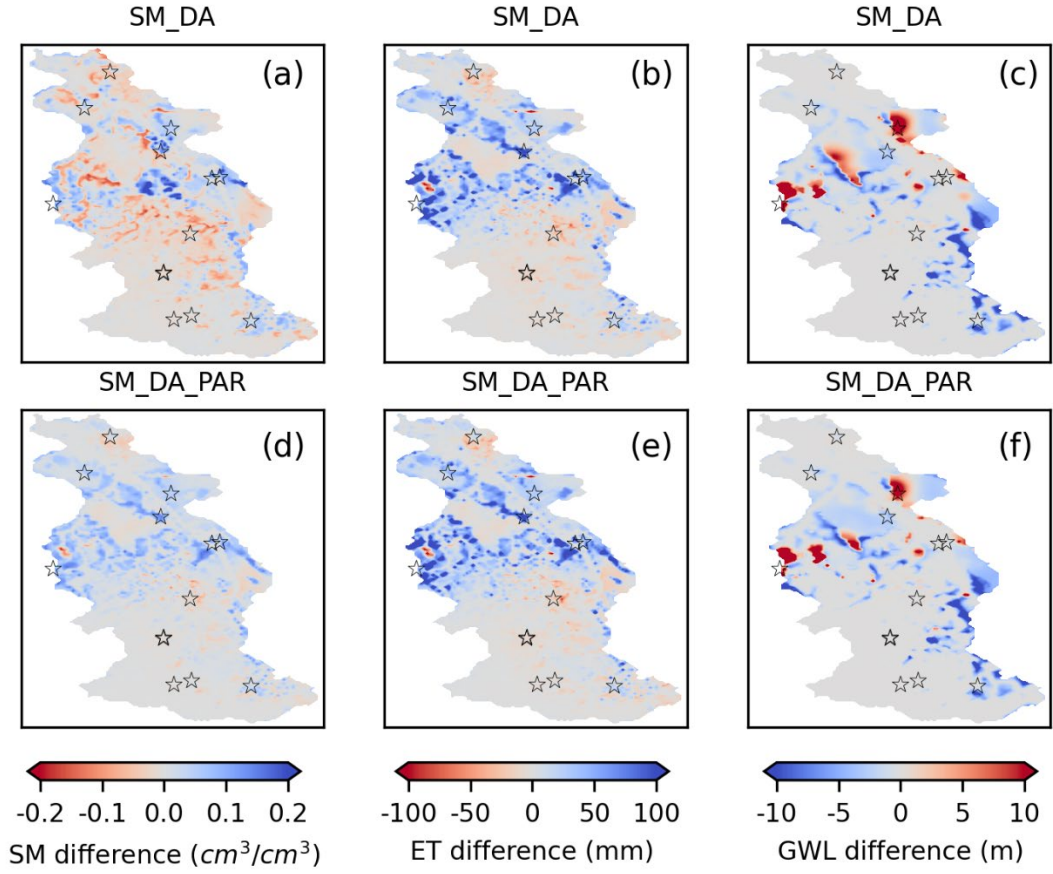

Figure S5. Spatial variations in annual soil moisture (0-80 cm), evapotranspiration, and groundwater level for 2017 are presented in panels (a)-(c), illustrating differences between SM\_DA and OL simulations (SM\_DA - OL). Panels (d)-(f) display similar contrasts between SM\_DA\_PAR and OL (SM\_DA\_PAR - OL). Black pentagrams indicate the locations of the CRNS monitoring stations.

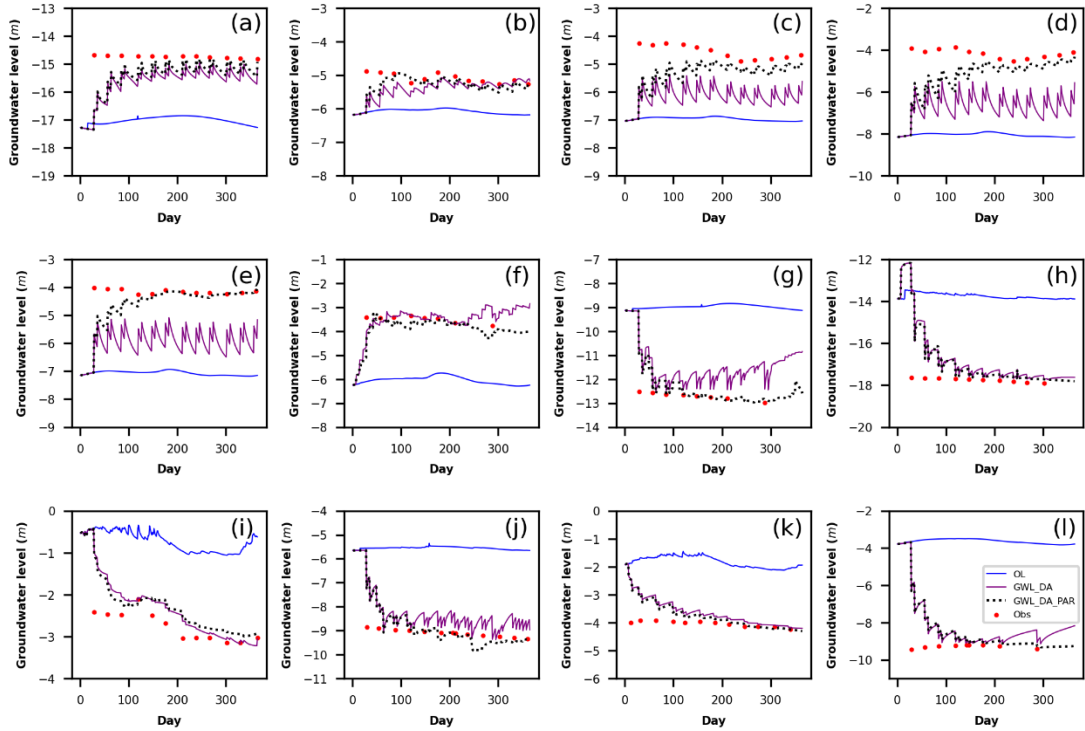

Figure S6. The groundwater level dynamics during 2018 were estimated using the OL (blue), GWL\_DA

(green), and GWL\_DA\_PAR (black) scenarios and compared with field data obtained from 12 selected assimilated groundwater wells (red).

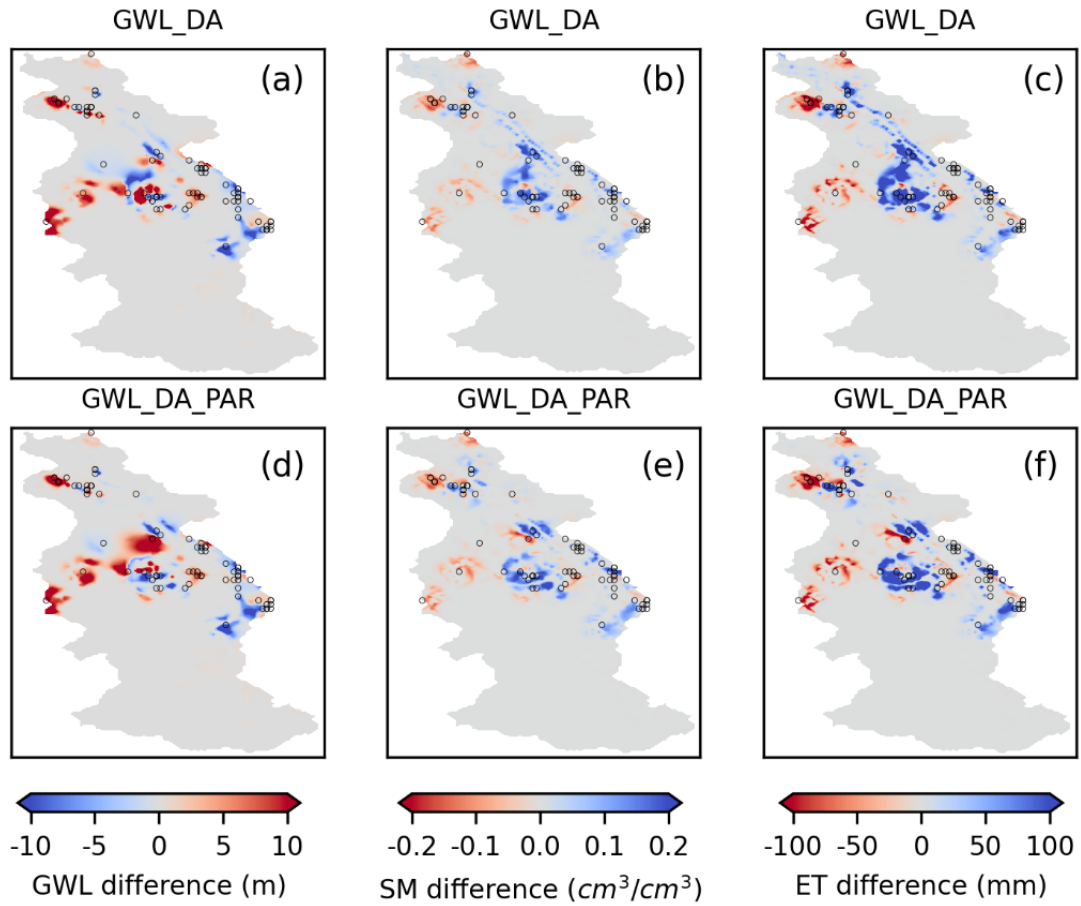

Figure S7. Spatial variations in annual groundwater level, soil moisture (0-80 cm), and evapotranspiration for 2016 are presented in panels (a)-(c), illustrating differences between GWL\_DA and OL simulations (GWL\_DA - OL). Panels (d)-(f) display similar contrasts between GWL\_DA\_PAR and OL (GWL\_DA\_PAR - OL). Black circles indicate the locations of the groundwater monitoring sites.



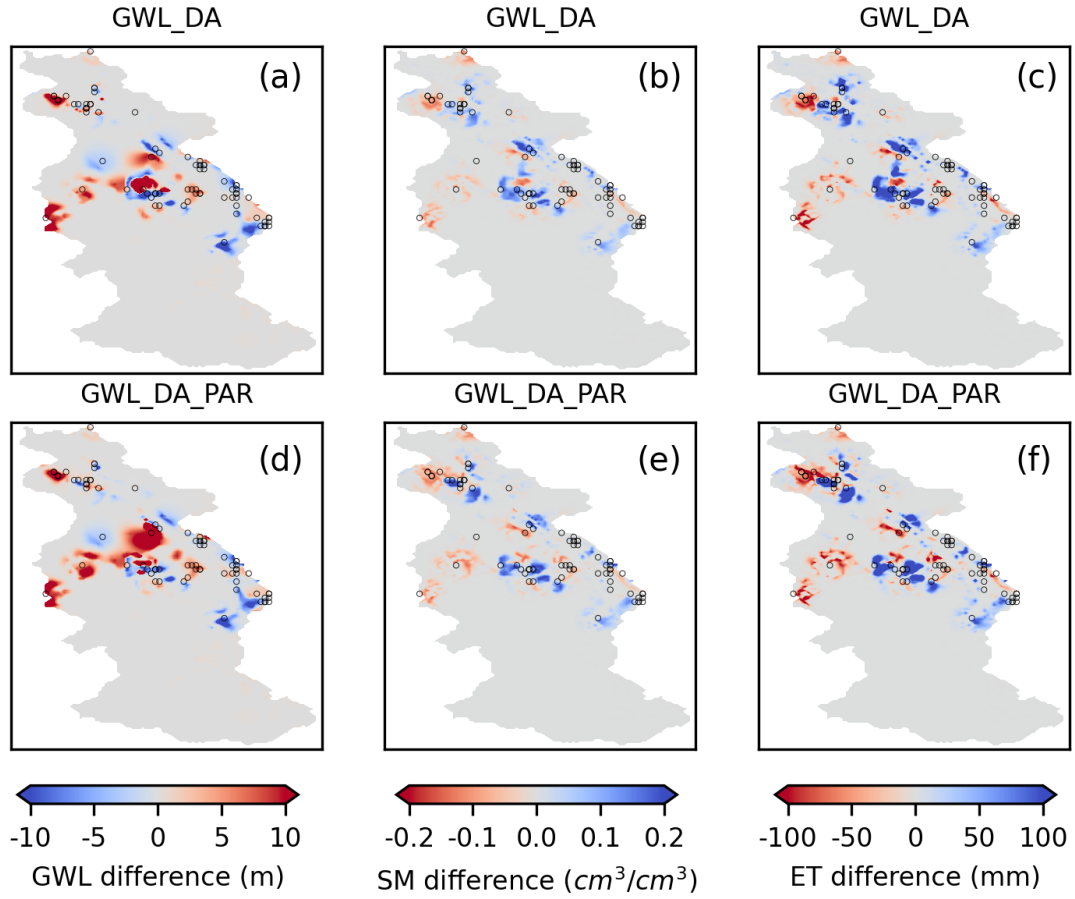

**Figure S8.** Spatial variations in annual groundwater level, soil moisture (0-80 cm), and evapotranspiration for 2017 are presented in panels (a)-(c), illustrating differences between GWL\_DA and OL simulations (GWL\_DA - OL). Panels (d)-(f) display similar contrasts between GWL\_DA\_PAR and OL (GWL\_DA\_PAR - OL). Black circles indicate the locations of the groundwater monitoring sites.



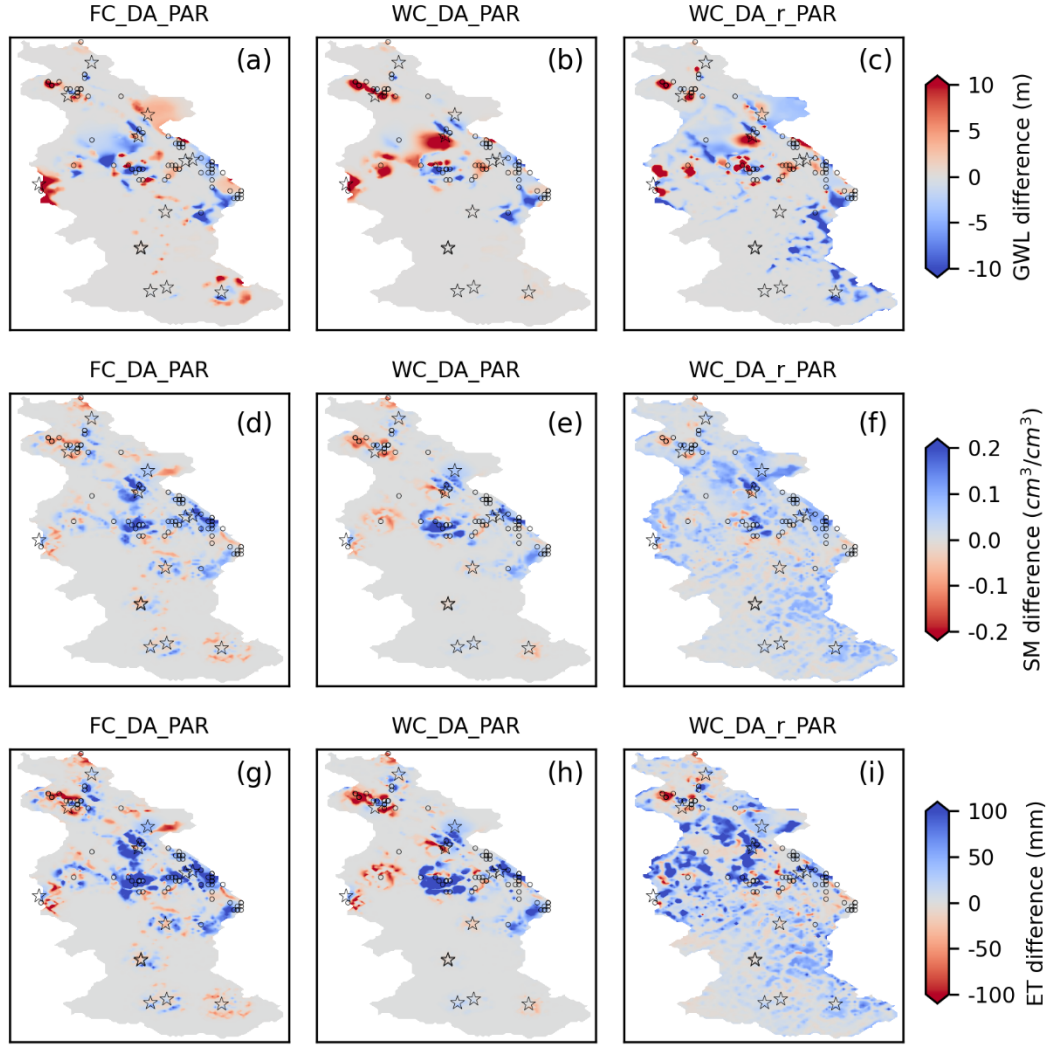

**Figure S9.** Spatial variations in the 2016 annual differences of groundwater level, 0-80 cm soil moisture, and evapotranspiration are shown in panels (a, d, g), comparing multivariate data assimilation scenarios FC\_DA\_PAR with the open-loop (OL) run. Panels (b, e, h) and (c, f, i) illustrate the respective differences for WC\_DA\_PAR and WC\_DA\_r\_PAR scenarios. Locations of CRNS and assimilated groundwater wells are indicated by black pentagrams and circles.

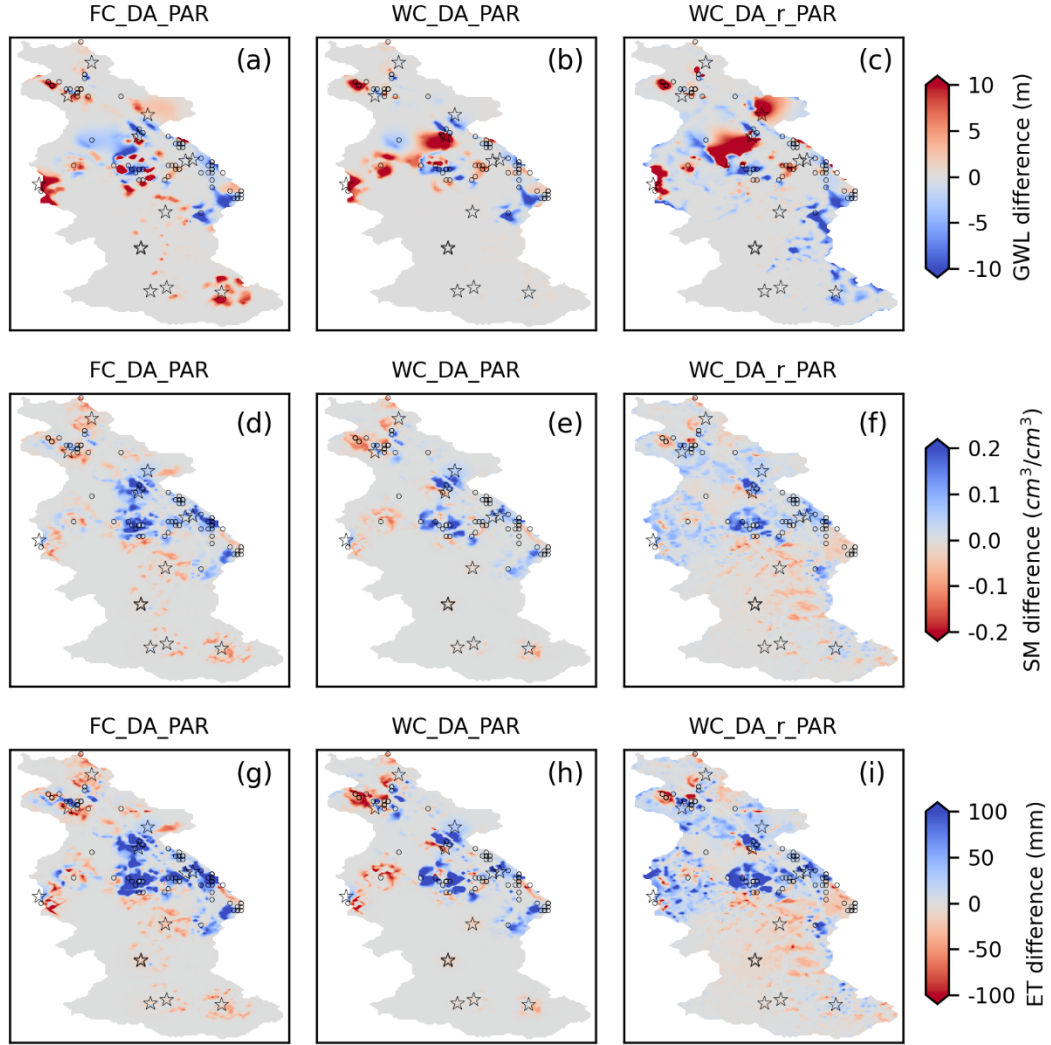

**Figure S10.** Spatial variations in the 2017 annual differences of groundwater level, 0-80 cm soil moisture, and evapotranspiration are shown in panels (a, d, g), comparing multivariate data assimilation scenarios FC\_DA\_PAR with the open-loop (OL) run. Panels (b, e, h) and (c, f, i) illustrate the respective differences for WC\_DA\_PAR and WC\_DA\_r\_PAR scenarios. Locations of CRNS and assimilated groundwater wells are indicated by black pentagrams and circles.

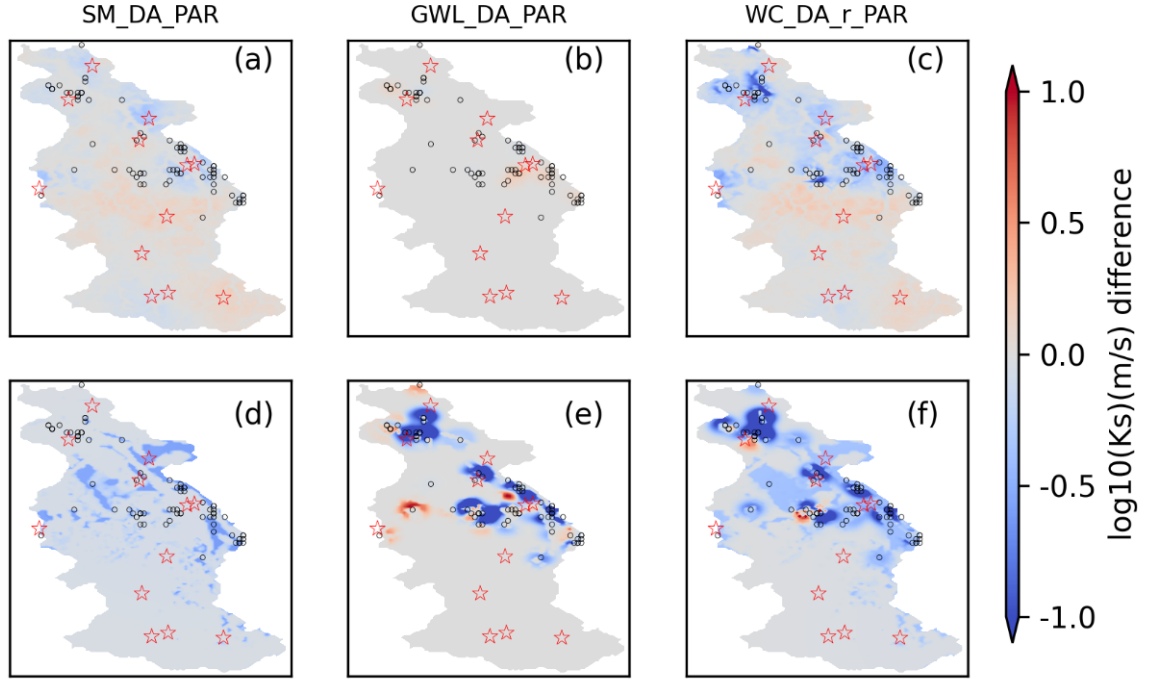

Figure S11. Spatial comparisons of ensemble mean  $\log_{10}K_s$  between the open-loop run and multiple data assimilation schemes for the year 2016. Panels (a) and (d) illustrate results from SM\_DA\_PAR; (b) and (e) display outputs for GWL\_DA\_PAR; (c) and (f) depict results from WC\_DA\_r\_PAR. The upper panels correspond to measurements at 2 cm soil depth, while the lower panels represent values at 10 m depth. Locations of CRNS measurement sites and assimilated groundwater wells are indicated by red pentagrams and black circles, respectively.

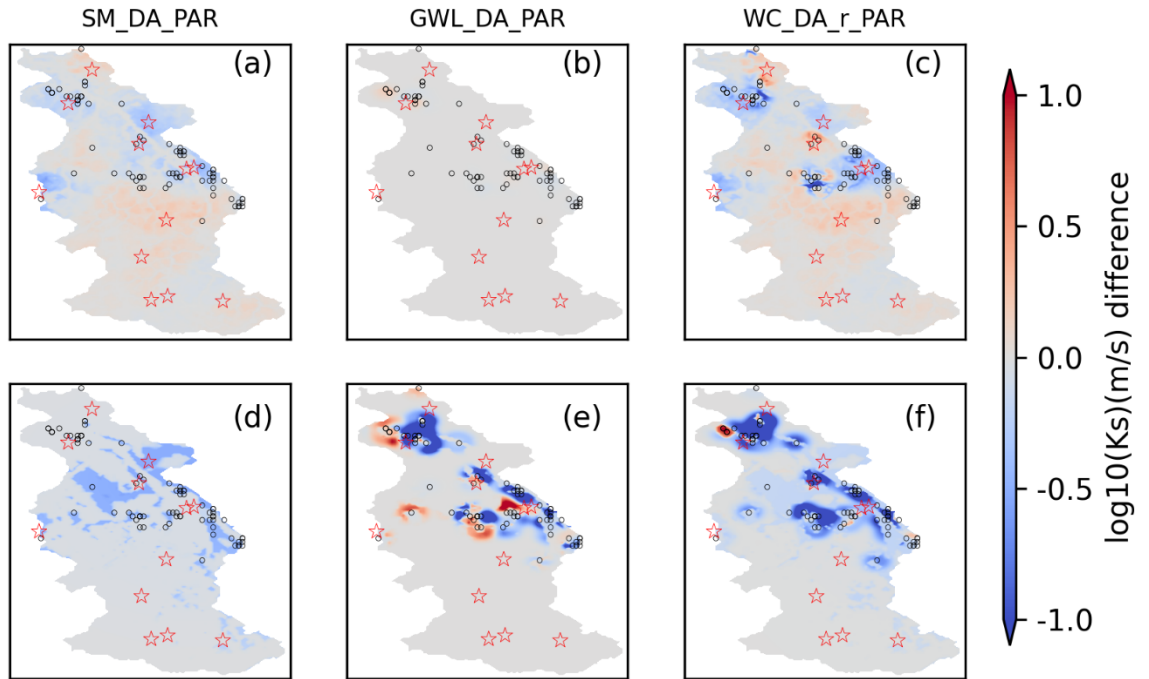

Figure S12. Spatial comparisons of ensemble mean  $\log_{10}K_s$  between the open-loop run and multiple data assimilation schemes for the year 2017. Panels (a) and (d) illustrate results from SM\_DA\_PAR; (b) and (e) display outputs for GWL\_DA\_PAR; (c) and (f) depict results from WC\_DA\_r\_PAR. The upper panels correspond to measurements at 2 cm soil depth, while the lower panels represent values at 10 m depth. Locations of CRNS measurement sites and assimilated groundwater wells are indicated by red pentagrams and black circles, respectively.
