# Supplementary material for: A new approach for joint assimilation of cosmic-ray neutron soil moisture and groundwater level data into an integrated terrestrial model
Source: Copernicus journal article supplement (doi:10.5194/egusphere-2025-2124), 2025-06-10
Supplement: Supplementary file [file egusphere-2025-2124-AC2-supplement.pdf]

## RC2: 'Comment on egusphere-2025-2124', Anonymous Referee #2

This is a well written and well executed technical study on multivariate DA for a catchment in Germany. The authors have a history of such studies, and this is another nice example.

*Response: Many thanks for your positive feedback.*

My main suggestion, to improve the potential impact of the paper, is that the authors expand on some of their comments because – at least to me – they are central to the motivation and implications of the study. However, they are currently not given appropriate attention.

*Response: Your point is taken. Please see our responses and revisions addressing your concerns below.*

Main comments:

[1] Why is there a trade-off between groundwater levels and soil moisture? How strongly are SM and GWL connected? How does this connection depend on the location within the catchment? Is it larger when GWL are shallower, and does it (for CNRS estimates) disconnect for deeper GWL?

*Response: We thank the reviewer for raising such important point. The trade-off between SM and GWL arises from their physical coupling through pressure head relationships and varies spatially: it is strong where groundwater is shallow and weaker where it is deep. Under deeper groundwater conditions, assimilating one variable may have little effect on the other or even slightly degrade its estimates. The limited improvement or occasional slight degradation of the non-assimilated variable can also be partly attributed to small ensemble sizes, which make covariance estimates less reliable. In addition, non-Gaussian soil moisture distributions under dry conditions can reduce the effectiveness of assimilating one variable in improving the estimates of the other. This effect is particularly pronounced for upper soil states when GWL is assimilated, or for deeper subsurface states when SM is assimilated from dry soils. These mechanisms explain why assimilation generally improves the targeted variable while its effect on the non-assimilated one depends on local hydrogeological and statistical conditions. These interpretations are supported by the results presented in Section 4.3 “Multivariate Data Assimilation of Soil Moisture and Groundwater Level” (Figures 7 and 8; Figures S9-S10 for other years). We have also added text in Section 5.1 (lines 658-678) to clarify this mechanism:*

“The observed deterioration may stem from spurious inter-variable covariances generated during the state estimation process. These covariances can modify the natural trade-offs between SM and GWL that arise from their physical coupling through soil water retention and pressure head relationships. Specifically, changes in shallow groundwater directly affect SM in the unsaturated zone, while SM dynamics control recharge and thus influence GWL. Importantly, the strength of this connection is not spatially uniform. In areas with shallow groundwater tables, SM and GWL are tightly coupled, so

assimilating one variable has stronger impacts on the other. In contrast, with deeper groundwater, the hydraulic link between SM and GWL weakens, and under such conditions this connection can be functionally disconnected, resulting in assimilating one variable having little or no effect on the other, and in some cases, minor degradations may occur. Such degradations may be partially caused by small ensemble sizes, which make estimated covariances less reliable, especially for weaker correlations. In addition, non-Gaussianity related to drier soil conditions may impair the effectiveness of assimilating one variable on improving the estimates of the other. This effect particularly impacts the upper soil states when GWL is assimilated, or the deeper subsurface states when SM is assimilated from dry soils. This issue can also be partly attributed to the use of point-scale observations, given that neutron sensing stations and groundwater monitoring wells are unevenly distributed across the study area. When assimilation targets only one state component (e.g., GWL), it is difficult to reduce uncertainties in hydrologically connected states (such as SM) at non-adjacent spatial locations. Such spatial heterogeneity and statistical limitation explain why assimilation of a single variable can improve its own estimates while occasionally causing small degradations in the other, depending on local hydrogeological settings.”

[2] You state that you propose a “novel multivariate assimilation method”. Can you be more explicit about its novelty, given that you cite references with previous multivariate DA examples. What is novel about the algorithm introduced in this study? I am not doubting its novelty, but you do not elaborate on this issue when introducing the algorithm, only in the discussion section.

*Response: While multivariate assimilation has been applied in previous hydrological studies, our approach differs in several key methodological aspects. Specifically: We introduce a weakly coupled multivariate DA scheme in which different observation types (CRNS-based SM and GWL) update only their physically related model states (unsaturated and saturated zones, respectively), thereby reducing spurious cross-variable correlations. We apply different localization radii for SM and GWL within the assimilation, accounting for their distinct spatial correlation characteristics, whereas previous DA studies (e.g., TSMP) typically used the same localization radius for both variables in joint assimilation. Additionally, the scheme updates SM and GWL at different intervals according to their typical behavior, with SM updated daily and groundwater weekly, reflecting their different timescales. We agree that these aspects should be stated earlier in the manuscript. Accordingly, we have revised Section 2.4 (“Localized Ensemble Kalman Filter for Data Assimilation”, lines 295-308) to highlight these aspects:*

“Earlier research by Zhang et al. (2018) showed that in TSMP, assimilating SM and/or GWL enables updates to all relevant subsurface states via DA. In this fully coupled DA configuration of Zhang et al. (2018), cross-variable covariances ensured that observations of one variable (e.g., SM) could directly adjust others (e.g., GWL). Later, Hung et al. (2022) applied GWL assimilation restricted to the saturated zones and demonstrated that this approach outperformed the fully coupled strategy of Zhang et al. (2018). In this study, we develop a new weakly coupled DA scheme that introduces separate update restrictions for each observation type: GWL observations are used to update only saturated cells, while SM

observations are used to update only unsaturated zones. This design minimizes potential spurious cross-variable correlations and enhances the robustness of multivariate assimilation. Additionally, updates are applied asynchronously to account for the different temporal dynamics of the variables: SM, which changes more rapidly, is typically updated daily, whereas groundwater, with slower dynamics, is updated weekly. Furthermore, unlike previous DA studies of TSMP, which generally used the same localization radius for joint GWL and SM assimilation, our approach applies different localization radii for the two variables, accounting for their distinct spatial correlation characteristics.”

[3] Lines 268-269. The authors state that: “With a localization radius of ~100 km, exceeding the domain size, assimilation effects covered the entire area.” Can you please elaborate on the meaning of this statement?

*Response: In the assimilation process, the localization radius defines the spatial extent to which observations influence model state updates. Our goal is to compare LEnKF multivariate assimilation of SM and GWL with previous single-variable EnKF studies in the Rur catchment (Batz et al., 2017; Li et al., 2023a), where assimilation of 12 CRNS stations improved SM across the entire catchment. To maintain comparability, we set the localization radius to ~100 km, which is sufficient to cover all  $100 \times 162$  grid cells (500 m resolution) within the catchment. Using a much larger radius, e.g., 1000 km, would not noticeably change catchment-scale effects, but could introduce unphysical correlations in the LEnKF ensemble. Therefore, a radius of ~100 km provides a balance between physical realism and consistency with earlier studies. We have added the following clarification in the revised manuscript (lines 285-288):*

“The Rur catchment model consists of  $100 \times 162$  grid cells with a resolution of  $500 \text{ m} \times 500 \text{ m}$ . Following previous EnKF studies using 12 CRNS stations (Batz et al., 2017; Li et al., 2023a), we set the localization radius to ~100 km to ensure that assimilation effects cover the entire study area.”

[4] The model improves through the assimilation, but what have you learned about the model? And especially its limitations? What does the updating reveal about problems within the model (that make the updating necessary)?

*Response: We thank the reviewer for this important question. Our results show that the assimilation not only improves model states but also reveals several limitations of the model. These limitations can be grouped into several categories, which are discussed in detail in the revised discussion section:*

#### **① Cross-variable trade-offs:**

*The updating process shows that single-variable assimilation improves the targeted variable but degrades the non-assimilated one. This reflects the model's limited ability to represent the nonlinear coupling between soil and groundwater, and highlights the influence of the uneven distribution of observations. This limitation increases the complexity of DA and may compromise filter performance. These issues are discussed in the revised manuscript as follows (lines 657-674):*

“When assimilation is limited to a single variable, either SM or GWL, it generally enhances the assimilated variable but frequently decreases the reliability of the non-assimilated one. The observed deterioration may stem from spurious inter-variable covariances generated during the state estimation process. These covariances can modify the natural trade-offs between SM and GWL that arise from their physical coupling through soil water retention and pressure head relationships. Specifically, changes in shallow groundwater directly affect SM in the unsaturated zone, while SM dynamics control recharge and thus influence GWL. Importantly, the strength of this connection is not spatially uniform. In areas with shallow groundwater tables, SM and GWL are tightly coupled, so assimilating one variable has stronger impacts on the other. In contrast, with deeper groundwater, the hydraulic link between SM and GWL weakens, and under such conditions this connection can be functionally disconnected, resulting in assimilating one variable having little or no effect on the other, and in some cases, minor degradations may occur. Such degradations may be partially caused by small ensemble sizes, which make estimated covariances less reliable, especially for weaker correlations. In addition, non-Gaussianity related to drier soil conditions may impair the effectiveness of assimilating one variable on improving the estimates of the other. This effect particularly impacts the upper soil states when GWL is assimilated, or the deeper subsurface states when SM is assimilated from dry soils. This issue can also be partly attributed to the use of point-scale observations, given that neutron sensing stations and groundwater monitoring wells are unevenly distributed across the study area.”

*And lines 810-816:*

“The EnKF, originally developed to address nonlinearity in dynamic modeling systems, has demonstrated effectiveness in coupled terrestrial simulations. This nonlinearity primarily arises from the complex interdependencies among state variables, such as the coupling between SM and GWL through pressure head dynamics (Camporese et al., 2009b). This inherent nonlinearity complicates the design of multivariate assimilation schemes. As a result, determining the most suitable observational inputs and evaluating the compromises associated with integrating diverse variables continue to pose major obstacles for upcoming investigations.”

## **② Spatial resolution limitations:**

*Coarser spatial resolution typically smooths terrain features, which reduces gradients in both surface and groundwater flows and likely contributes to persistent discrepancies in simulated GWL. This aspect is discussed in the manuscript (lines 756-765) as detailed below:*

“While advancements have been made, the assimilation results still indicate unresolved uncertainties that should be addressed in future work. Part of this uncertainty arises from the model’s use of coarse spatial discretization. Coarser spatial resolution typically smooths terrain features, which reduces gradients in both surface and groundwater flows and likely contributes to persistent discrepancies in simulated GWL. Moreover, DA tends to be less effective in the presence of such systematic biases. For example, Xue et al. (2021) systematically evaluated hydrological simulations over High Mountain Asia using models at different spatial resolutions, and found that coarse model resolution introduced systematic biases in runoff, particularly over complex terrain, thereby limiting the effectiveness of DA. Future research could

explore finer spatial resolutions (e.g., 100 m) to more accurately represent groundwater systems linked to narrow valleys, thereby minimizing biases caused by coarse spatial discretization and improving DA performance.”

### ③ *Structural simplifications:*

*The updating process also highlights structural simplifications in the model. For example, GWL assimilation assumes hydrostatic equilibrium, while real-world aquifer systems are more complex, with layered aquifers, aquitards, and anthropogenic withdrawals. These simplifications contribute to systematic biases and make updating necessary. This point is discussed in Section 5.2 (Uncertainty Analysis and Enhancement Strategies) of the manuscript (lines 790-800).*

“Beyond spatial resolution and observation distribution, structural deficiencies in the model may contribute to persistent uncertainties and further complicate the effective application of DA with real-world observations. This study performs GWL assimilation under the simplifying assumption of hydrostatic equilibrium, even though real-world conditions are considerably more complex. Multiple aquifers can coexist in a vertically layered system, separated by intervening aquitards. Additionally, fault lines may act as horizontal barriers that disrupt aquifer continuity, potentially altering groundwater flow patterns and their spatial distribution. Anthropogenic groundwater withdrawal also significantly affects aquifers. This is particularly evident in the Rur catchment, where hydrogeological conditions are strongly influenced by water management practices aimed at preventing water accumulation in open-cast lignite mines (Bogena et al., 2018). These processes are insufficiently represented in the current model, which contributes to systematic biases and makes updating necessary.”

### ④ *Parameterization issue:*

*The experiments show that updating only saturated hydraulic conductivity ( $K_s$ ) improves long-term states but has little short-term effect. This reveals that systematic biases cannot be corrected by state updates alone and may require additional parameter and model improvements. This is discussed in Section 5.2 of the manuscript (lines 819-831).*

“The primary objective of multivariate DA is to enhance the accuracy of both state variables and associated parameter estimates. This research focused on updating  $K_s$ , identified as a critical parameter for the subsurface groundwater system. Although the temporal evolution of assimilated states may not show large differences between experiments with and without  $K_s$  updates, this does not imply that parameter updating is ineffective. For example, in our experiments,  $K_s$  updates led to reductions in ubRMSE of more than 10% for both GWL and SM compared with state-only assimilation. However, the immediate temporal impact of  $K_s$  updates may be limited, partly due to the constrained adjustment range applied by the fixed damping factor (0.1) and the slow response of groundwater states. Moreover, model biases are also influenced by other factors, including forcing uncertainty and structural model errors, which may play a dominant role in the temporal evolution of SM and groundwater states. Nevertheless, parameter-updating experiments improved performance metrics and long-term mean states, demonstrating their value in correcting systematic model biases that cannot be fully addressed by state assimilation alone.”

[5] (section 4.1) When assimilating SM only, ET and GWL changed by just a few percent. How relevant is this change? How does this change compare to – say – making slightly different assumptions about the noise and noise structure? Or is this small change the equivalent to essentially no change? You state in your abstract that: “However, assimilating GWL independently had a negative effect on SM representation, and similarly, assimilating SM alone degraded GWL predictions.” This effect seems very minimal, and I do not really see a significant decline in SM performance when GWL is assimilated.

*Response: We thank the reviewer for the comment. In the revised manuscript, we explicitly report that while univariate assimilation improves the targeted variable, it may also introduce minor degradations in the non-assimilated variable. The corresponding text in Section 4.1 (Univariate Soil Moisture Assimilation, lines 402-407) has been revised to more explicitly describe the changes in GWL under univariate SM assimilation.*

“However, GWL ubRMSE metric showed variable changes when only SM was assimilated, ranging from -7% to 15% across individual years, where positive values indicate a deterioration in performance. Over the 2016-2018 period, the average change in ubRMSE was small, corresponding to 3.87% for SM\_DA and -0.41% for SM\_DA\_PAR. Overall, SM assimilation had a minor negative effect on GWL, with some annual variability.”

*The text in Section 4.2 (Univariate Groundwater Level Assimilation, lines 459-465) has also been updated to provide a clearer description of how SM is affected by univariate GWL assimilation.*

“In contrast to the large improvements in GWL, univariate GWL assimilation generally had a limited negative impact on SM, with interannual variability. Over the 2016-2018 period, the average SM ubRMSE was  $0.09 \text{ cm}^3/\text{cm}^3$  in GWL\_DA and  $0.11 \text{ cm}^3/\text{cm}^3$  in GWL\_DA\_PAR, compared with  $0.09 \text{ cm}^3/\text{cm}^3$  in OL. In individual years, SM ubRMSE ranged from 0.09 to  $0.10 \text{ cm}^3/\text{cm}^3$  in GWL\_DA, corresponding to annual changes of 0-25% compared with OL value in each respective year. In GWL\_DA\_PAR, SM ubRMSE further increased to  $0.10\text{--}0.11 \text{ cm}^3/\text{cm}^3$ , reflecting annual rises of over 20% relative to OL values of the corresponding year.”

[6] (section 4.2) How would you reduce the problem that performance declines with distance from assimilation wells?

*Response: Thanks for pointing this out. As noted in the manuscript, assimilation performance indeed declines with distance from observation wells. To address this, several local improvements can be applied. First, adaptive localization can directly mitigate performance decline with distance by adjusting the influence radius based on local conditions. Second, increasing the number of wells and using higher spatial resolution reduces grid-cell aggregation and wet biases, allowing more wells to be effectively assimilated and mitigating performance decline in distant areas. At larger scales, integrating spatially distributed datasets, such as remote sensing products for soil moisture (such as SMOS, SMAP, and AMSR-E/AMSR2) and terrestrial water storage (such as GRACE/GRACE-FO), can provide additional*

*constraints across the domain, further mitigating performance decline with distance. We have added extra discussions of these potential approaches and how they address this issue in the revised manuscript (lines 765-773).*

“Furthermore, the performance of assimilation tends to decline with increasing distance from observation wells, as localized updates have weaker influence on more remote areas. Potential strategies to mitigate this issue include applying adaptive localization radii, assimilating spatially distributed datasets (e.g., RS products), or increasing the number of groundwater wells to enhance spatial coverage. Employing higher spatial resolution reduces the likelihood of multiple observation wells being located within a single grid cell, thereby allowing a larger number of wells to be effectively assimilated. It also reduces wet biases in simulated GWL, decreasing the probability of wells falling within river or near-river grid cells and thereby increasing the number of observations that can be reliably assimilated.”

*And lines 782-789:*

“To broaden the applicability of this approach, future studies could focus on integrating more widely accessible datasets, such as terrestrial water storage variations derived from GRACE/GRACE-FO (Tapley et al., 2019; Khaki et al., 2017) or RS-based SM products (Bayat et al., 2021). Such spatially distributed observations could also help to reduce the decline in assimilation performance with distance from individual ground-based observations, thereby providing additional constraints across larger areas. However, these data products are unfortunately too coarse to resolve hydrological processes in our study area, highlighting the need for higher-resolution observations for effective local-scale assimilation.”

[7] (discussion section) Can the independent updating of different parts of the model lead to water balance issues?

*Response: We thank the reviewer for this important question. Independent updates of SM and groundwater states in our framework can introduce temporary local water balance perturbations, which are a normal consequence of data assimilation and may persist depending on site-specific conditions. In our coupled TSMP system, these perturbations are dynamically adjusted through surface-subsurface interactions, preventing systematic errors at the catchment scale. While not necessarily larger than in uncoupled models, these local imbalances are dynamically regulated in coupled systems through interactions between surface and subsurface processes. This point has been added in the revised discussion (Section 5.1, lines 719-728).*

“Beyond improving state estimates, the impact of independent updates on water balance needs to be considered. During assimilation, SM and groundwater states are modified directly, which can temporarily disturb the local water balance. These imbalances may persist for a period depending on site-specific conditions. Such local imbalances are common in data assimilation, but the tight coupling between CLM and ParFlow ensures that surface and subsurface fluxes redistribute these adjustments through the model’s physical processes. Consequently, at the catchment scale, independent updates do not induce systematic water balance errors, as they only alter storage states and local imbalances are mitigated by the coupled



land-subsurface dynamics. Compared to uncoupled models, these local imbalances are not necessarily larger, but in coupled systems they are redistributed differently due to interactions between surface and subsurface processes.”

[8] In the conclusion you again state that: “However, assimilating GWL data alone negatively affected SM prediction accuracy, and similarly, assimilating SM data alone reduced the accuracy of GWL estimates.” However, the improvement during univariate assimilation is more than a factor 10 than the reduction in the other variables. I think it would be good to discuss this aspect a bit more transparently.

*Response: We thank the reviewer for this suggestion. In the revised manuscript, we have clarified the relative magnitudes of improvements and deteriorations during univariate assimilation. The results indicate that the benefits of univariate assimilation outweigh the negative effects on the non-assimilated variable and highlight the need for multivariate approaches to improve both variables simultaneously. Specifically, in the discussion section (lines: 678-683), we now state:*

“However, the observed reductions in the non-assimilated variable are relatively small compared with the improvements in the assimilated variable, suggesting that univariate assimilation still provides substantial benefits for the targeted state. These limitations of univariate assimilation underscore the value of multivariate approaches, which may better account for the coupled dynamics of SM and GWL and improve the accuracy of both states simultaneously.”

*In the conclusion (lines 861-867), we have quantified these effects:*

“However, assimilating GWL data alone negatively affected SM prediction accuracy, with the 2016-2018 average ubRMSE increasing by approximately 20%. Similarly, assimilating SM data alone reduced the accuracy of GWL estimates, leading to a less than 4% rise in the 2016-2018 average ubRMSE. Overall, the improvements in the targeted state clearly exceeded the limited deteriorations in the non-assimilated state, demonstrating the benefit of univariate assimilation. This also highlights the importance of multivariate approaches for achieving simultaneous improvements in both variables.”

## **New references added in the revised manuscript:**

Bayat, B., Camacho, F., Nickeson, J., Cosh, M., Bolten, J., Vereecken, H., and Montzka, C.: Toward operational validation systems for global satellite-based terrestrial essential climate variables, *International Journal of Applied Earth Observation and Geoinformation*, 95, 102240, 10.1016/j.jag.2020.102240, 2021.

Cooper, E., Blyth, E., Cooper, H., Ellis, R., Pinnington, E., and Dadson, S. J.: Using data assimilation to optimize pedotransfer functions using field-scale in situ soil moisture observations, *Hydrology and Earth System Sciences*, 25, 2445-2458, 10.5194/hess-25-2445-2021, 2021.

Dimitrova-Petrova, K., Rosolem, R., Soulsby, C., Wilkinson, M. E., Lilly, A., and Geris, J.: Combining



static and portable Cosmic ray neutron sensor data to assess catchment scale heterogeneity in soil water storage and their integrated role in catchment runoff response, *Journal of Hydrology*, 601, 126659, 10.1016/j.jhydrol.2021.126659, 2021.

Fersch, B., Francke, T., Heistermann, M., Schrön, M., Döpper, V., Jakobi, J., Baroni, G., Blume, T., Bogen, H., Budach, C., Gränzig, T., Förster, M., Güntner, A., Hendricks Franssen, H. J., Kasner, M., Köhli, M., Kleinschmit, B., Kunstmann, H., Patil, A., Rasche, D., Scheffele, L., Schmidt, U., Szulc-Seyfried, S., Weimar, J., Zacharias, S., Zreda, M., Heber, B., Kiese, R., Mares, V., Mollenhauer, H., Völksch, I., and Oswald, S.: A dense network of cosmic-ray neutron sensors for soil moisture observation in a highly instrumented pre-Alpine headwater catchment in Germany, *Earth Syst. Sci. Data*, 12, 2289-2309, 10.5194/essd-12-2289-2020, 2020.

Franz, T. E., Zreda, M., Rosolem, R., and Ferre, T. P. A.: A universal calibration function for determination of soil moisture with cosmic-ray neutrons, *Hydrology and Earth System Sciences*, 17, 453-460, 10.5194/hess-17-453-2013, 2013.

Patil, A., Fersch, B., Hendricks Franssen, H.-J., and Kunstmann, H.: Assimilation of Cosmogenic Neutron Counts for Improved Soil Moisture Prediction in a Distributed Land Surface Model, *Frontiers in Water*, 3, 10.3389/frwa.2021.729592, 2021.

Xue, Y., Houser, P. R., Maggioni, V., Mei, Y., Kumar, S. V., and Yoon, Y.: Evaluation of High Mountain Asia-Land Data Assimilation System (Version 1) From 2003 to 2016, Part I: A Hyper-Resolution Terrestrial Modeling System, *Journal of Geophysical Research: Atmospheres*, 126, 10.1029/2020jd034131, 2021.

Zafarmomen, N., Alizadeh, H., Bayat, M., Ehtiat, M., and Moradkhani, H.: Assimilation of Sentinel-Based Leaf Area Index for Modeling Surface-Ground Water Interactions in Irrigation Districts, *Water Resources Research*, 60, 10.1029/2023wr036080, 2024.
